# Supplementary material for: Macroplastic surface characteristics change during wind abrasion
Source: Springer Nature journal article supplement (doi:10.1038/s41598-025-02738-w), 2025-05-21
Supplement: MOESM2 [file 41598_2025_2738_MOESM2_ESM.pdf]

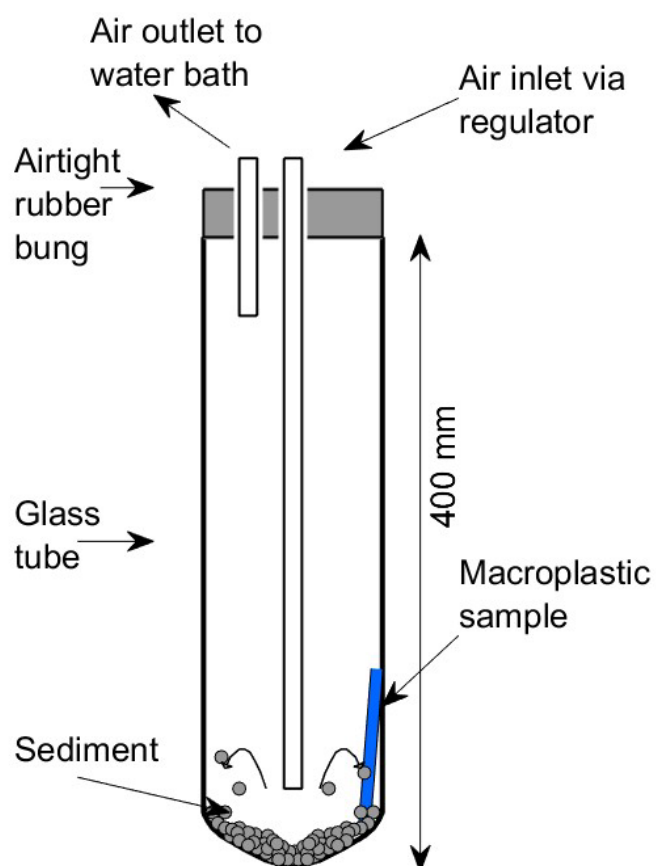

Supplementary Figure S1: Schematic diagram of abrasion chamber apparatus used for the experiments. Air velocity at the base of the inlet is  $11.7 \text{ m s}^{-1}$ . Sediment particle velocity within the chamber is c.  $0.63 \text{ m s}^{-1}$
